# Supplementary material for: Clinical Characteristics of Inpatients with Childhood vs. Adolescent Anorexia Nervosa
Source: Nutrients. 2019 Oct 28;11(11):2593. doi: 10.3390/nu11112593 (PMC6893829; doi:10.3390/nu11112593)
Supplement: Supplementary file 1 [file nutrients-11-02593-s001.pdf]

**Table S1.** Ethics statement. List of all involved ethics committees.

| #  | Study center | Ethics committee                                                                                         | Reference number      |
|----|--------------|----------------------------------------------------------------------------------------------------------|-----------------------|
| 1  | Essen        | ethics committee of the medical faculty of the University Essen                                          | 12-5169-BO            |
| 2  | Aachen       | ethics committee of the medical faculty of the RWTH Aachen                                               | EK028/12              |
| 3  | Mainz        | ethics committee of the local medical advisory board Rheinland-Pfalz                                     | 837.130.16<br>(10449) |
| 4  | Marburg      | ethics committee of the medical faculty of the Philipps-University Marburg                               | 86/14                 |
| 5  | Würzburg     | ethics committee of the medical faculty of the Julius-Maximilians-University Würzburg                    | 180/13_z              |
| 6  | Dresden      | ethics committee of the TU Dresden                                                                       | EK 342092014          |
| 7  | Freiburg     | ethics committee of the Albert-Ludwigs-University Freiburg                                               | 132/14                |
| 8  | Viersen      | ethics committee of the local medical advisory board Nordrhein                                           | 2014183               |
| 9  | Homburg      | ethics committee of the local medical advisory board Saarbrücken                                         | 220/13                |
| 10 | Berlin       | ethics committee (board nr. 2) of the Charité Berlin                                                     | EA2/003/14            |
| 11 | Heidelberg   | ethics committee of the medical faculty Heidelberg                                                       | S-244/2015            |
| 12 | Hamm         | ethics committee of the medical faculty of the Ruhr-Universität Bochum                                   | 5082-14               |
| 13 | Tübingen     | ethics committee of the medical faculty of the Eberhard-Karls-Universität Tübingen                       | 343/2014BO1           |
| 14 | Ulm          | ethics committee of the university of Ulm                                                                | 170/07                |
| 15 | Bonn         | joint vote with center in Viersen                                                                        |                       |
| 16 | Münster      | ethics committee of the medical advisory board Westfalen-Lippe and the Westfälische Wilhelms-Universität | 2016-384-b-S          |

**Table S2.** Age, illness duration and sex distribution at admission of children and adolescents with AN.

|             | Age at admission<br>(years) | Duration of illness before<br>admission (months)<br>M±SD | Females<br>N=282<br>n (%) | Males<br>N=7<br>n (%) |
|-------------|-----------------------------|----------------------------------------------------------|---------------------------|-----------------------|
| Children    | 8                           | a                                                        | 1 (0.4)                   | 0 (0)                 |
|             | 10                          | 3.0±1.4                                                  | 3 (1.1)                   | 0 (0)                 |
|             | 11                          | 6.6±3.0                                                  | 10 (3.5)                  | 0 (0)                 |
|             | 12                          | 5.4±3.5                                                  | 11 (3.9)                  | 1 (14.3)              |
|             | 13                          | 7.8±4.9                                                  | 45 (16.0)                 | 1 (14.3)              |
| Adolescents | 14                          | 8.0±4.9                                                  | 64 (22.7)                 | 0 (0)                 |
|             | 15                          | 9.5±7.5                                                  | 63 (22.3)                 | 2 (28.6)              |
|             | 16                          | 10.3±6.9                                                 | 51 (18.1)                 | 2 (28.6)              |
|             | 17                          | 14.4±14.2                                                | 32 (11.3)                 | 1 (14.3)              |
|             | 18                          | 22.0±0.0                                                 | 2 (0.7)                   | 0 (0)                 |

a: Duration of illness was not calculated due to missing values.

**Table S3.** Parental situation, number of siblings, school types of the patient and parental educational attainment.

|                            | Children with AN<br>n=72 | Adolescents with AN<br>n=217 | X <sup>2</sup> -Test |
|----------------------------|--------------------------|------------------------------|----------------------|
|                            | n (%)                    | n (%)                        | p                    |
| <b>Parental situation</b>  | <b>71 (100)</b>          | <b>212 (100)</b>             | <b>0.77</b>          |
| Living with both parents   | 51 (71.8)                | 161 (76.0)                   |                      |
| Living with one parent     | 20 (28.2)                | 51 (24.0)                    |                      |
| <b>Number of siblings</b>  | <b>72 (100)</b>          | <b>217 (100)</b>             | <b>0.90</b>          |
| 0                          | 11 (15.3)                | 30 (13.8)                    |                      |
| 1                          | 34 (47.2)                | 109 (50.2)                   |                      |
| ≥2                         | 27 (37.5)                | 78 (36.0)                    |                      |
| <b>School type*</b>        | <b>72 (100)</b>          | <b>217 (100)</b>             | <b>0.78</b>          |
| „Gymnasium“                | 43 (59.7)                | 128 (59.0)                   |                      |
| „Gesamtschule“             | 9 (12.5)                 | 24 (11.1)                    |                      |
| „Realschule“               | 14 (19.4)                | 41 (18.9)                    |                      |
| „Hauptschule“              | 3 (4.2)                  | 6 (2.8)                      |                      |
| other secondary schools    | 3 (4.2)                  | 18 (8.3)                     |                      |
| <b>Graduation father**</b> | <b>61 (100)</b>          | <b>189 (100)</b>             | <b>0.39</b>          |
| „Abitur“                   | 37 (60.6)                | 116 (61.4)                   |                      |
| „Mittlere Reife“           | 14 (23.0)                | 51 (27.0)                    |                      |
| „Hauptschulabschluss“      | 10 (16.4)                | 18 (9.5)                     |                      |
| no graduation              | 0 (0)                    | 2 (2.1)                      |                      |
| <b>Graduation mother**</b> | <b>62 (100)</b>          | <b>189 (100)</b>             | <b>0.35</b>          |
| „Abitur“                   | 37 (59.7)                | 95 (50.3)                    |                      |
| „Mittlere Reife“           | 20 (32.3)                | 83 (43.9)                    |                      |
| „Hauptschulabschluss“      | 4 (6.5)                  | 10 (5.3)                     |                      |
| no graduation              | 1 (1.6)                  | 1 (0.5)                      |                      |

\*We decided to keep the German terms for the different school types and graduations, because they are not quite comparable to other countries' school systems. Gymnasium = school covering both the lower and upper secondary levels, in-depth general education aimed at the general higher education entrance qualification; Gesamtschule = type of school at the lower secondary level offering several grades of education leading to different qualifications; Realschule = school at the lower secondary level with extensive general education; Hauptschule = school at the lower secondary level with basic general education.

\*\***Abitur** = Secondary school qualification after 12 or 13 years of school education, which constitutes the general higher education entrance qualifications; **Mittlere Reife** = general education school, which leaves a certificate obtained on completion of grade 10 at the Realschule; **Hauptschulabschluss** = general education school that leaves a certificate obtained on completion of grade 9 at the Hauptschule.
